# Supplementary material for: Streambed microstructure predicts evolution of development and life history mode in the plethodontid salamander Eurycea tynerensis
Source: Springer Nature journal article supplement (doi:10.1186/1741-7007-4-6), 2006-03-02
Supplement: 12915_2005_61_MOESM1_ESM.pdf [file 12915_2005_61_MOESM1_ESM.pdf]

**Additional File 1. Locality information and representative mitochondrial DNA sequences.**

| Tree code/<br>map number | Locality                                       | Museum<br>Accession<br>Number | Genbank<br>Accession<br><i>nad4</i> | Genbank<br>Accession<br><i>cob</i> |
|--------------------------|------------------------------------------------|-------------------------------|-------------------------------------|------------------------------------|
| M1                       | AR: Van Buren Co., Weaver Creek                | UTA 56374                     | AY528272                            | AY528347                           |
| M2                       | AR: Clerburne Co., stream near Ida             | UTA 57119                     | DQ358999                            | DQ359006                           |
| M3                       | AR: Van Buren Co., Bradley Brook, near Clinton | UTA 57120                     | DQ359000                            | DQ359007                           |
| M4                       | AR: Van Buren Co., stream near Cardon Cr.      | UTA 57118                     | DQ359001                            | DQ359008                           |
| M5                       | AR: White Co., Little Creek                    | UTA 56375                     | AY528273                            | AY528348                           |
| M6                       | AR: Marion Co., Gray Spring                    | UTA 56381                     | AY528279                            | AY528354                           |
| M7                       | AR: Newton Co., Low Gap Springs                | UTA 56389                     | AY528288                            | AY528363                           |
| M8                       | AR: Benton Co., Ashmore Creek                  | UTA 56387                     | AY528286                            | AY528361                           |
| M9                       | OK: Sequoyah Co., Tin Cup Creek                | UTA 56402                     | AY528293                            | AY528368                           |
| M10                      | OK: Sequoyah Co., 10 mi NE of Gore             | UTA 56398                     | AY528291                            | AY528366                           |
| M11                      | OK: Sequoyah Co., near Cookson                 | UTA 56399                     | AY528292                            | AY528367                           |
| P1                       | OK: Cherokee Co., Rock Creek                   | UTA 53860                     | AY528299                            | AY528374                           |
| P2                       | OK: Cherokee Co., Tyner Creek                  | UTA 57121                     | DQ359002                            | DQ359009                           |
| P3                       | OK: Cherokee Co., Peavine Creek                | UTA 56405                     | AY528302                            | AY528377                           |
| P4                       | OK: Cherokee Co., Cave spring, near Peggs      | UTA 57161                     | DQ359003                            | DQ359010                           |
| P5                       | OK: Delaware Co., Spring near Colcord          | UTA 56410                     | AY528305                            | AY528380                           |
| P6                       | AR: Benton Co., Spavinaw Creek, at Rt 43.      | no voucher                    | DQ359004                            | DQ359011                           |
| P7                       | MO: McDonald Co., Mill Creek                   | UTA 56392                     | AY528306                            | AY528381                           |
| P8                       | MO: McDonald Co., Mike's Creek                 | UTA 56393                     | AY528307                            | AY528382                           |
| P9                       | MO: McDonald Co., Big Sugar Creek              | UTA 56394                     | AY528308                            | AY528383                           |
| P10                      | MO: Stone Co., Pine Run                        | UTA 56395                     | AY528309                            | AY528384                           |
| P11                      | MO: Christian Co., Buseik S.F.                 | no voucher                    | DQ359005                            | DQ359012                           |
| <i>E. spelaea</i>        | MO: Barry Co., Rockhouse Cave                  | UTA 56364                     | AY528318                            | AY528393                           |
| <i>E. multiplicata</i>   | OK: Choctow Co., near Ft. Towson               | UTA 56367                     | AY528255                            | AY528330                           |
